# Supplementary material
Source: Springer Nature journal article supplement (https://www.springermedizin.de/resource/supplementary/13722_2013_242_MOESM1_ESM.pdf/9675362)
Supplement: MOESM1 [file 9675362]

### A. Methadone clinic visits three days per week

|                                                 |                                                 |                                                  |                                                    |                                                   |                                                 |                                                   |
|-------------------------------------------------|-------------------------------------------------|--------------------------------------------------|----------------------------------------------------|---------------------------------------------------|-------------------------------------------------|---------------------------------------------------|
| <b>SUNDAY</b><br>Varenicline 1 mg<br>Take in AM | <b>MONDAY</b><br>Varenicline 1 mg<br>Take in AM | <b>TUESDAY</b><br>Varenicline 1 mg<br>Take in AM | <b>WEDNESDAY</b><br>Varenicline 1 mg<br>Take in AM | <b>THURSDAY</b><br>Varenicline 1 mg<br>Take in AM | <b>FRIDAY</b><br>Varenicline 1 mg<br>Take in AM | <b>SATURDAY</b><br>Varenicline 1 mg<br>Take in AM |
| <b>SUNDAY</b><br>Varenicline 1 mg<br>Take in PM | <b>MONDAY</b><br>Varenicline 1 mg<br>Take in PM | <b>TUESDAY</b><br>Varenicline 1 mg<br>Take in PM | <b>WEDNESDAY</b><br>Varenicline 1 mg<br>Take in PM | <b>THURSDAY</b><br>Varenicline 1 mg<br>Take in PM | <b>FRIDAY</b><br>Varenicline 1 mg<br>Take in PM | <b>SATURDAY</b><br>Varenicline 1 mg<br>Take in PM |

### B. Methadone clinic visits six days per week

|                                                 |                                                 |                                                  |                                                    |                                                   |                                                 |                                                   |
|-------------------------------------------------|-------------------------------------------------|--------------------------------------------------|----------------------------------------------------|---------------------------------------------------|-------------------------------------------------|---------------------------------------------------|
| <b>SUNDAY</b><br>Varenicline 1 mg<br>Take in AM | <b>MONDAY</b><br>Varenicline 1 mg<br>Take in AM | <b>TUESDAY</b><br>Varenicline 1 mg<br>Take in AM | <b>WEDNESDAY</b><br>Varenicline 1 mg<br>Take in AM | <b>THURSDAY</b><br>Varenicline 1 mg<br>Take in AM | <b>FRIDAY</b><br>Varenicline 1 mg<br>Take in AM | <b>SATURDAY</b><br>Varenicline 1 mg<br>Take in AM |
| <b>SUNDAY</b><br>Varenicline 1 mg<br>Take in PM | <b>MONDAY</b><br>Varenicline 1 mg<br>Take in PM | <b>TUESDAY</b><br>Varenicline 1 mg<br>Take in PM | <b>WEDNESDAY</b><br>Varenicline 1 mg<br>Take in PM | <b>THURSDAY</b><br>Varenicline 1 mg<br>Take in PM | <b>FRIDAY</b><br>Varenicline 1 mg<br>Take in PM | <b>SATURDAY</b><br>Varenicline 1 mg<br>Take in PM |

Observed doses

Take home doses
